# Supplementary material
Source: Springer Nature journal article supplement (https://www.springermedizin.de/resource/supplementary/12958_2012_1056_MOESM1_ESM.pdf/9566654)

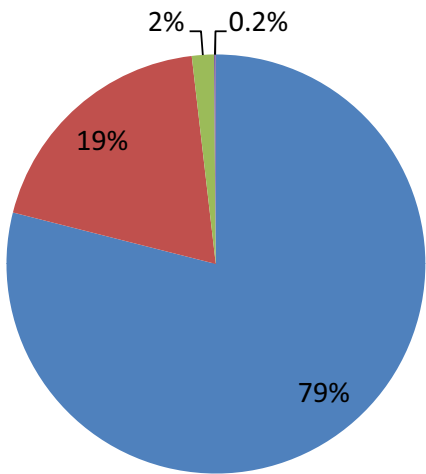

- very easy
- a little difficult
- difficult
- very difficult

Supplement: MOESM1 [file 9566654]
